# Supplementary material for: Integrated metabolomics and transcriptomics revealed the anti-constipation mechanisms of xylooligosaccharides from corn cobs
Source: Royal Society of Chemistry journal article supplement (doi:10.1039/d3fo04366e), 2023-12-20
Supplement: d3fo04366e1.pdf [file d3fo04366e1.pdf]

## Supplementary Materials

### **Integrated metabolomics and transcriptomics revealed the anti-constipation mechanisms of xylooligosaccharides from corn cobs**

Hong Song <sup>a</sup>, Rui Guo <sup>a</sup>, Xianbao Sun <sup>a</sup>, Yuxing Kou <sup>a</sup>, Xuan Ma <sup>a</sup>, Yinan Chen <sup>a</sup>, Lihua Song <sup>a</sup>, Yan Wu <sup>a\*</sup>

*<sup>a</sup> Department of Food Science and Engineering, School of Agriculture and Biology, Shanghai Jiao Tong University, Shanghai 200240, China;*

\*Corresponding author: Yan Wu

Tel.: +86-21-34205715

**Table S1.** Primer sequences used for qPCR.

| Gene                           | Sequence (5' to 3')   |                       |
|--------------------------------|-----------------------|-----------------------|
|                                | Forward               | Reverse               |
| <i>GAPDH</i>                   | AACGACCCCTTCATTGACCTC | CCTTGACTGTGCCGTTGAACT |
| <i>IL-1<math>\alpha</math></i> | CCTGTTGTATCAACTGTGTTC | GATGTCCCAACCAGGACAG   |
| <i>IL-6</i>                    | GCCCACCAAGAACGATAGTCA | ACCAGCATCAGTCCAAGAAG  |
| <i>IL-1<math>\beta</math></i>  | TGCCACCTTTTGACAGTGATG | TGATGTGCTGCTGCGAGATT  |
| <i>TNF-<math>\alpha</math></i> | CCTATGTCTCAGCCTCTTCT  | CCTGGTATGAGATAGCAAAT  |
| <i>Hmgcs2</i>                  | GGCTATAAAGCTGCGGAGGG  | CATGGTGAAAGAGCCAAAGGG |
| <i>Acat1</i>                   | AATGCTGGAGATTGACCCCC  | CGGGCTCCAGACATCCCAAT  |
| <i>Cyp11a1</i>                 | GGTAGTTCTTGGAGCTTCCCC | ATGATCTAGGTGGCTGCTTGG |
| <i>Sult1e1</i>                 | GCCAAAGATGTGCGCCGTTTC | AACCATACGGAACCTTGCCCT |

| Category                       | NC            | CM             | LXOS           | MXOS           | HXOS           |
|--------------------------------|---------------|----------------|----------------|----------------|----------------|
| Feces water content (%)        | 49.52±4.93 a  | 29.69±5.29 d   | 35.08±4.25 c   | 41.55±3.82 b   | 45.46±4.44 b   |
| Feces weight (g)               | 0.074±0.017 a | 0.031±0.011c   | 0.049±0.020 b  | 0.064±0.018 a  | 0.066±0.014 a  |
| First black stool time (min)   | 97.72±8.93 d  | 183.75±26.82 a | 161.73±23.07 b | 136.91±15.59 c | 128.47±18.50 c |
| Intestinal propulsion rate (%) | 81.72±8.20 a  | 55.12±6.83 c   | 66.71±7.07 b   | 72.50±9.81 b   | 77.73±9.23 ab  |
| Gastric emptying rate (%)      | 66.16±4.64 a  | 22.05±5.90 e   | 40.11±4.12 d   | 46.54±4.56 c   | 51.27±5.39 b   |

**Table S2.** Effects of XOS on defecation-related parameters in constipated mice.

Note: Results are expressed as mean ± SD (n = 10). Means with different letters in the same row are significantly different ( $p < 0.05$ ).

**Table S3.** Statistics of hepatic RNA-sequencing reads in different groups after filtering.

| Sample ID | Total reads | Total bases | Total giga bases | Q20 rate | Q30 rate | GC content |
|-----------|-------------|-------------|------------------|----------|----------|------------|
| NC01      | 43447400    | 6203466717  | 6.2G             | 98.13%   | 92.87%   | 49.71%     |
| NC02      | 42822188    | 6106166260  | 6.11G            | 98.44%   | 93.59%   | 49.50%     |
| NC03      | 42278862    | 6005035805  | 6.01G            | 98.50%   | 93.77%   | 50.42%     |
| CM01      | 43900210    | 6279900028  | 6.28G            | 98.28%   | 93.22%   | 48.79%     |
| CM02      | 45002090    | 6450166882  | 6.45G            | 98.46%   | 93.63%   | 48.97%     |
| CM03      | 47855692    | 6853427947  | 6.85G            | 98.23%   | 93.11%   | 49.19%     |
| XOS01     | 45049634    | 6446582229  | 6.45G            | 98.49%   | 93.72%   | 49.77%     |
| XOS02     | 43534534    | 6220613510  | 6.22G            | 98.47%   | 93.63%   | 49.79%     |
| XOS03     | 40597570    | 5795038088  | 5.8G             | 98.43%   | 93.53%   | 49.59%     |

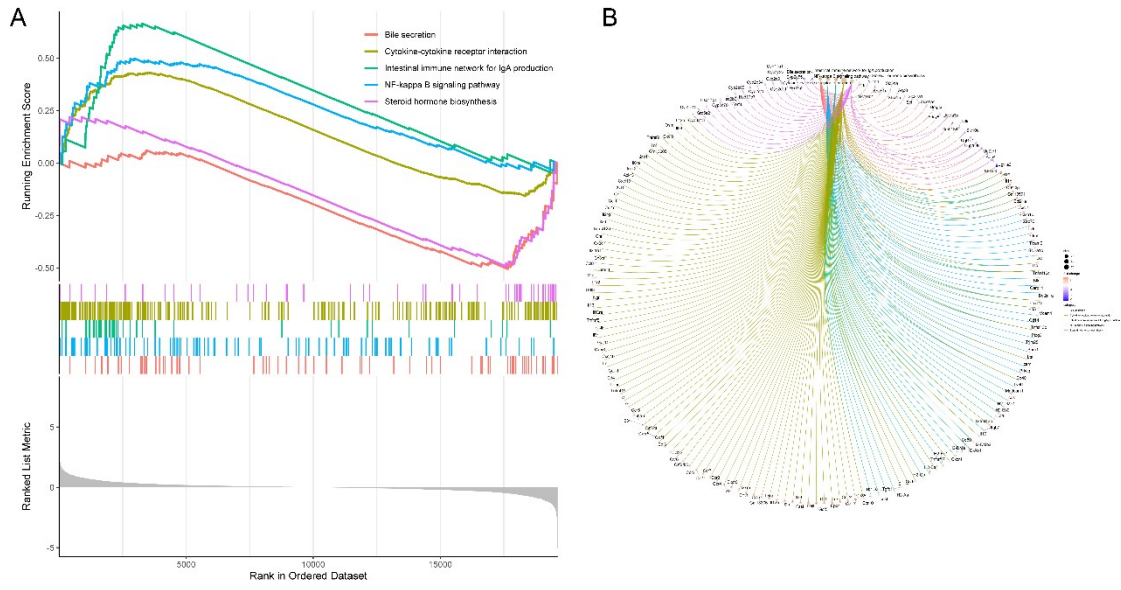

**Fig. S1** Gene Set Enrichment Analysis (GSEA). (A) GSEA plot and (B) circular cnetplot.
